# Supplementary material for: Low-voltage perovskite light-emitting transistors: a novel approach utilizing solution-processed high-k inorganic dielectrics for full-color emission
Source: Royal Society of Chemistry journal article supplement (doi:10.1039/d5tc00231a), 2025-01-01
Supplement: d5tc00231a1.pdf [file d5tc00231a1.pdf]

# Low-Voltage Perovskite Light-Emitting Transistors: A Novel Approach Utilizing Solution-Processed High-K Inorganic Dielectrics for Full-Color Emission

Xingyu Zhang, Min Guo, Jia Li, Tingting Dai, Zihong Yang, Zhidong Lou, Yanbing Hou, Feng Teng\*, and Yufeng Hu\*

Key Laboratory of Luminescence and Optical Information, Ministry of Education,  
Institute of Optoelectronic Technology, Beijing Jiaotong University, Beijing, 100044,  
P.R. China

E-mail: yfhu@bjtu.edu.cn, fteng@bjtu.edu.cn

Key Words: Multi-dimensional perovskite film; Light emitting transistor; CsPbBr<sub>3</sub>;  
PVP modification; Metal oxide semiconductor

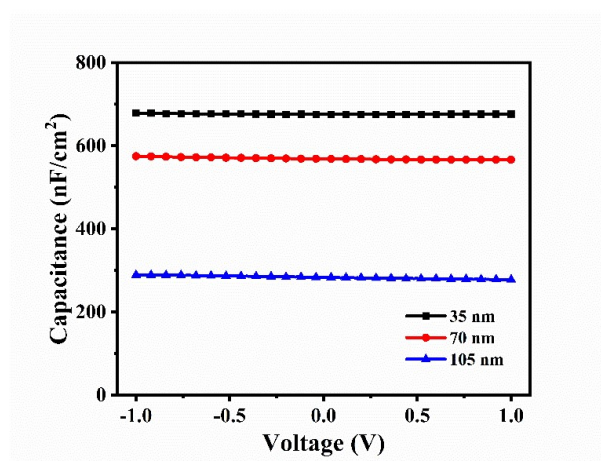

Figure S1. C-V curves of capacitors with different HfO<sub>x</sub> thicknesses.

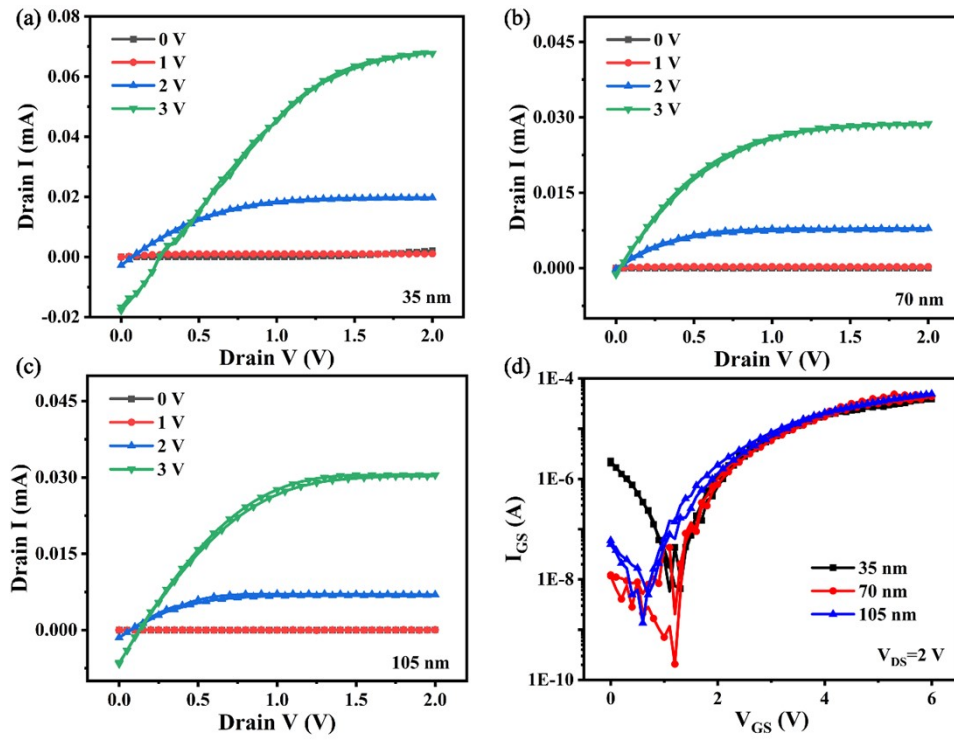

Figure S2. Output curve of the ZTO transistor with a (a)35 nm, (b)70 nm, and (c)105 nm  $\text{HfO}_x$  dielectric layer. (d) Gate-source current ( $I_{GS}$ ) curves of ZTO transistors with  $\text{HfO}_x$  dielectric layers of varying thicknesses.

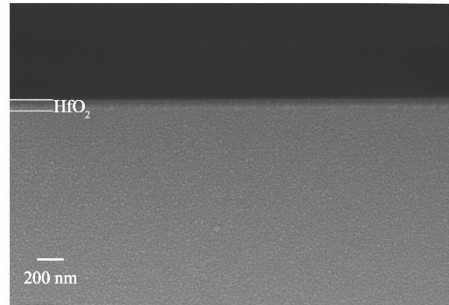

Figure S3. Cross-sectional SEM image of 70 nm  $\text{HfO}_x$ .

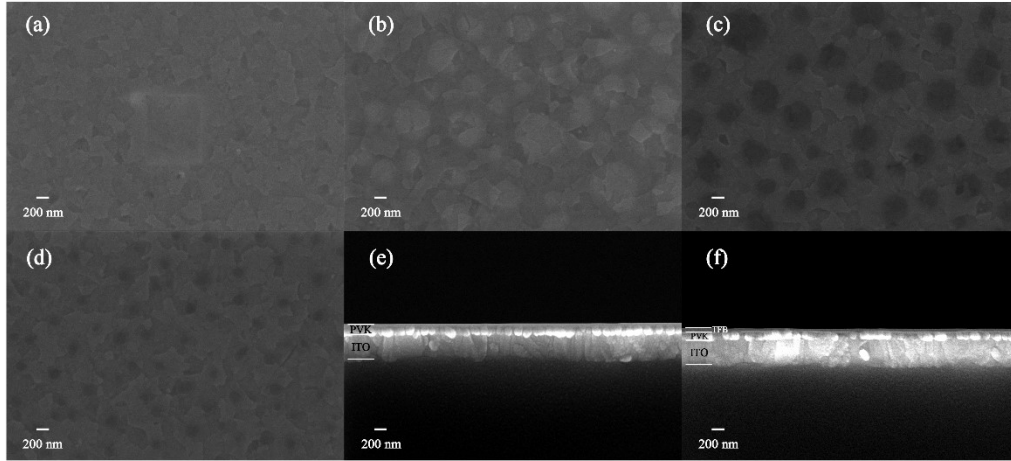

Figure S4. Hole transport layer with different mixing ratios: (a) PVK, (b) PVK: TFB=6: 2, (c) PVK: TFB=4: 4, (d) PVK: TFB=2: 6. Cross-sectional SEM image of (e) PVK and (f) PVK: TFB=6: 2.

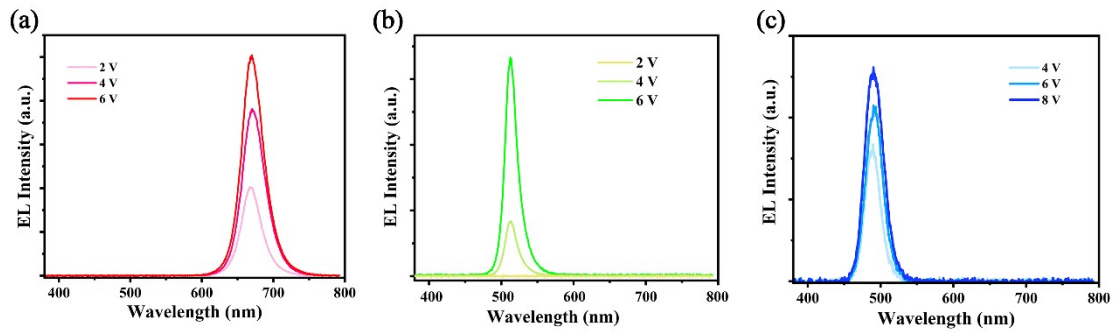

Figure S5. The EL intensity of the (a) red-light-emitting perovskite field-effect transistor, (b) green-light-emitting perovskite field-effect transistor, and (c) blue-light-emitting perovskite field-effect transistor varies with gate voltage.
